# Supplementary material for: Dynamic patterns of information flow in complex networks
Source: Springer Nature journal article supplement (doi:10.1038/s41467-017-01916-3), 2017-12-13
Supplement: 41467_2017_1916_MOESM3_ESM.pdf [file 41467_2017_1916_MOESM3_ESM.pdf]

## Description of Additional Supplementary Files

File Name: Supplementary Software 1

Description: DynamicFlow.m (Matlab) accepts a user defined weighted/directed network  $A_{ij}$  and a selected dynamic model  $\mathbf{M}$  as input. It provides the flow through all nodes  $F_i$  and links  $F_{ij}$ , both numerically and theoretically, as in Fig. 3a,b. It also allows to implement the SIR model, as shown in Fig. 5.
